# Supplementary material for: Multivariate Linear Regression Models to Predict Monomer Poisoning Effect in Ethylene/Polar Monomer Copolymerization Catalyzed by Late Transition Metals
Source: MDPI journal article supplement (doi:10.3390/inorganics10020026), 2022-02-21
Supplement: s1 [file s1]

## Supporting Information

### **Multivariate Linear Regression Models to Predict Monomer Poisoning Effect in Ethylene/Polar Monomer Copolymerization Catalyzed by Late Transition Metals**

Wei Zhao,<sup>†</sup> Zhihao Liu,<sup>†</sup> Yanan Zhao,<sup>†,\*</sup> Yi Luo,<sup>†,‡,\*</sup> Shengbao He<sup>‡</sup>

<sup>†</sup>*State Key Laboratory of Fine Chemicals, School of Chemical Engineering, Dalian University of Technology, Dalian 116024, China.*

<sup>‡</sup>*PetroChina Petrochemical Research Institute, Beijing, 102206, China.*

*\*E-mail: yananzhao@dlut.edu.cn, luoyi@dlut.edu.cn*



Taking diimide palladium as an example, the single-point calculations were further performed at the higher level by using the density functional method M06, and 6-311+G (d, p) was used for the nonmetal atoms and the basis set LANL2DZ as well as the associated pseudopotential were applied for the Pd atom. In these single-point calculations, the solvation effect of toluene ( $\epsilon = 2.37$ ) was considered through the CPCM model.

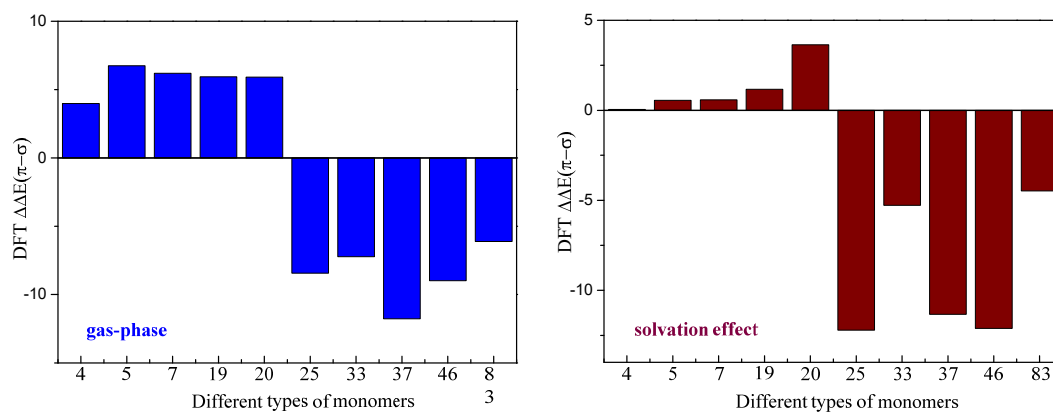

**Figure S1.** Gas-phase vs. solvation effect  $\Delta\Delta E(\pi-\sigma)$  (kcal/mol) for complex **II<sub>Pd</sub>**.



# 87 polar monomers

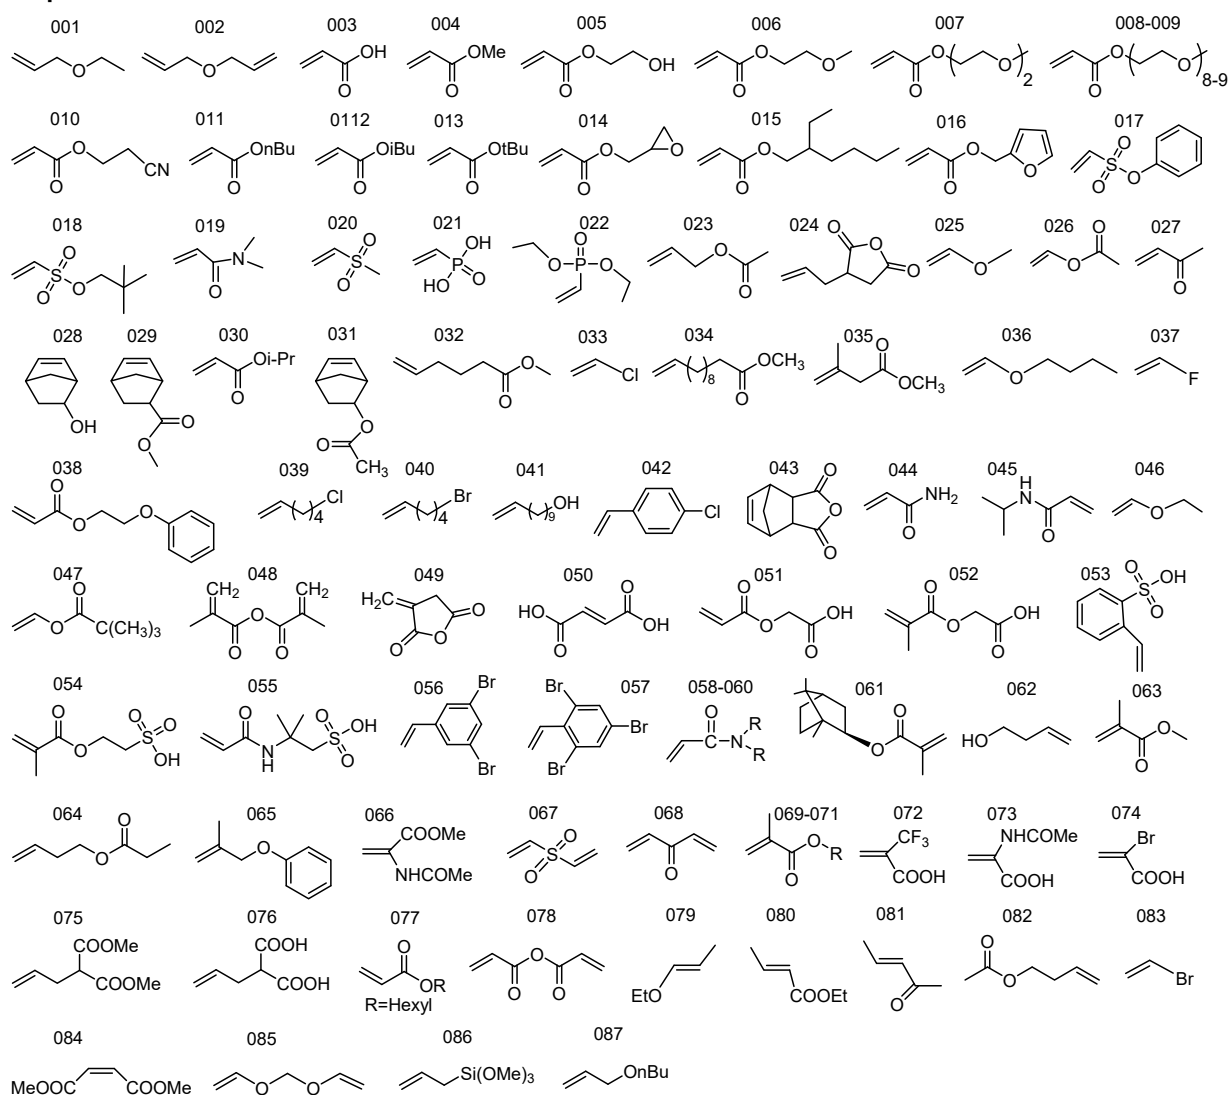

**Figure S2.** 87 polar monomers are used in the calculation of this work.



The descriptors of  $\pi$ -coordination structure **B3** (by complex **II<sub>Ni</sub>**) and polar monomers are calculated for multivariate linear regression. A total of 19 descriptors were calculated, including Sterimol values [50] ( $B^2B1_{Ni-X}$ ,  $B^2B5_{Ni-X}$  and  $B^2L_{Ni-X}$ ), steric hindrance of metal center ( $B^3Steric_{Ni}$ ), bond length ( $B^3bond_{Ni-\pi-max}$  and  $B^3bond_{Ni-\pi-min}$ ), Infrared freq ( $^{mon}IR_{C=C}$ ) and Freq Intensities ( $^{mon}v_{C=C}$ ), NMR ( $^{mon}NMR_C^\alpha$ ,  $^{mon}NMR_C^\beta$  and  $^{mon}NMR_X$ ), NBO ( $B^3NBO_{Ni}$ ,  $^{mon}NBO_X$ ,  $^{mon}NBO_C^\alpha$  and  $^{mon}NBO_C^\beta$ ), Polarizability ( $^{mon}\alpha$ ), HOMO ( $^{mon}HOMO$ ), volume ( $^{mon}V$ ) and Dipole Moment ( $^{mon}\mu$ ).

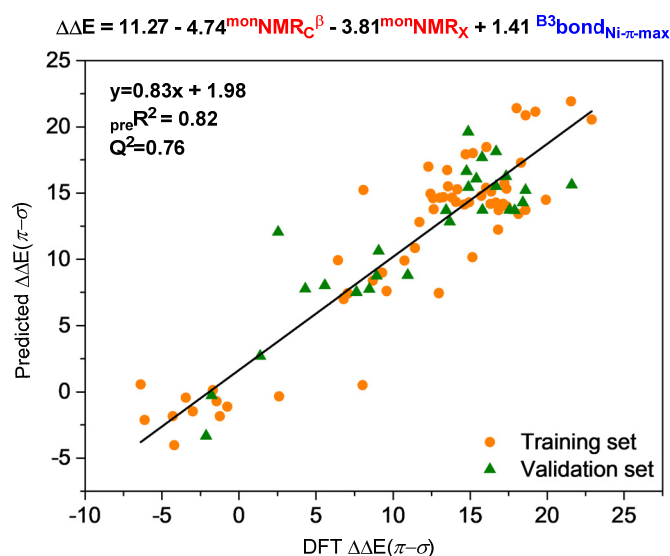

**Figure S3.** Plot of computed vs. predicted  $\Delta\Delta E(\pi-\sigma)$  (kcal/mol) for complex **II<sub>Ni</sub>** (base on  $\pi$ -coordination structure) using the multivariate linear regression models.

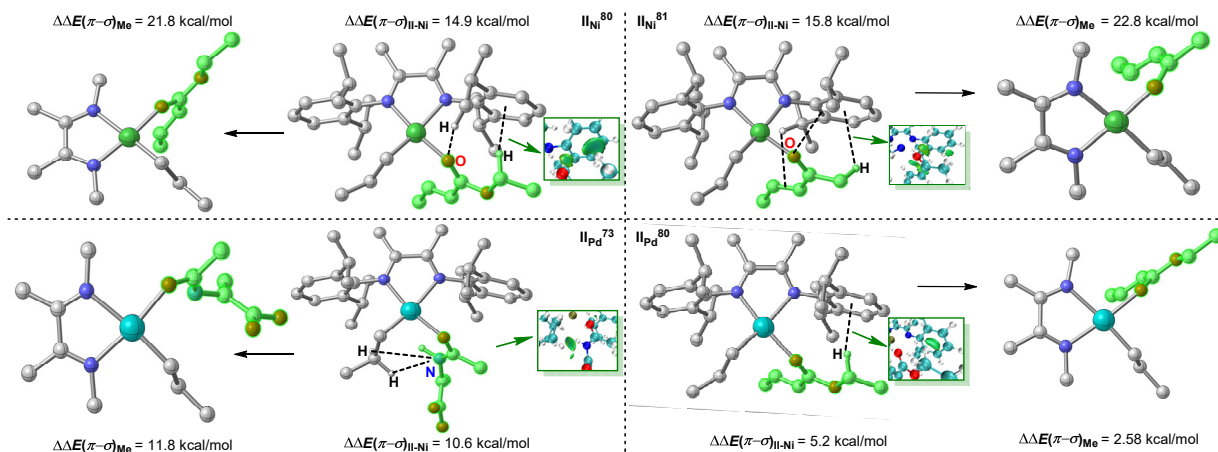

**Figure S4.** Changes of structure and  $\Delta\Delta E(\pi-\sigma)$  after substitution of aromatic ring on catalyst (complex **II<sub>Ni</sub>**) with methyl.
